# Supplementary material
Source: Springer Nature journal article supplement (https://www.springermedizin.de/resource/supplementary/12939_2013_363_MOESM1_ESM.pdf/9550988)

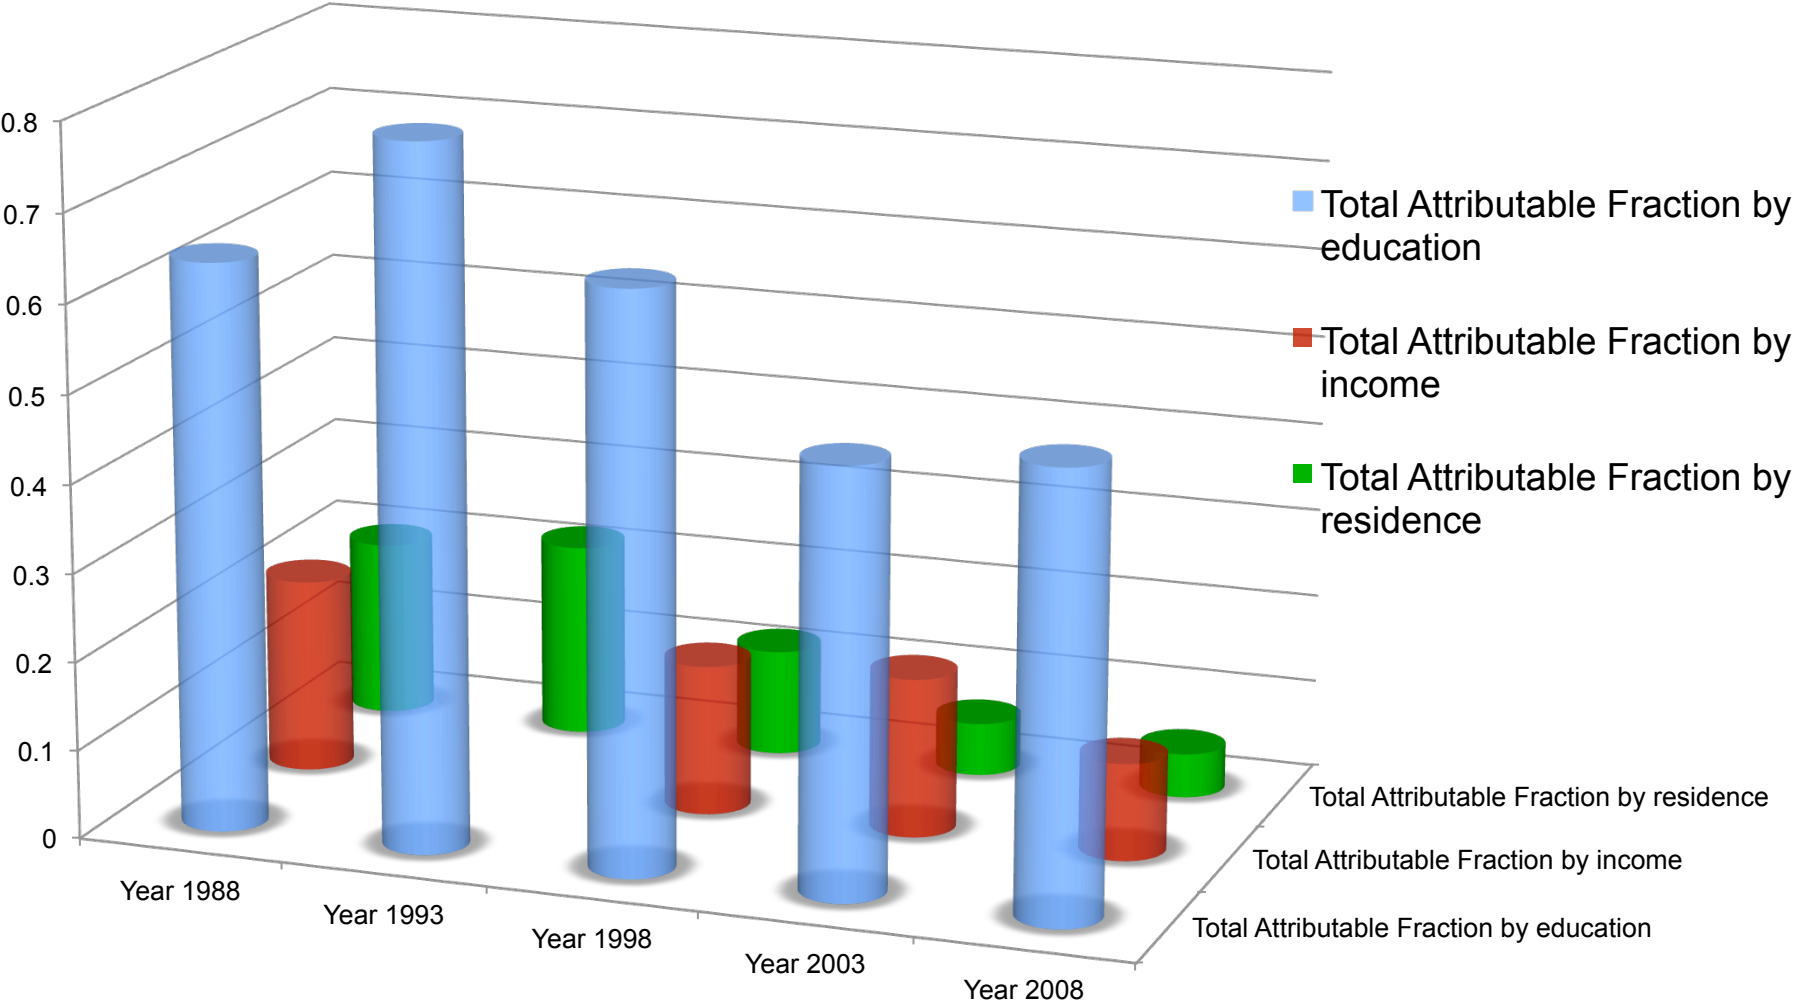

Supplement: MOESM1 [file 9550988]
